# Supplementary material for: Texture Coding in the Rat Whisker System: Slip-Stick Versus Differential Resonance
Source: PubMed Central journal article supplement (PMC2525689; doi:10.1371/journal.pbio.0060215), 2008-08-26

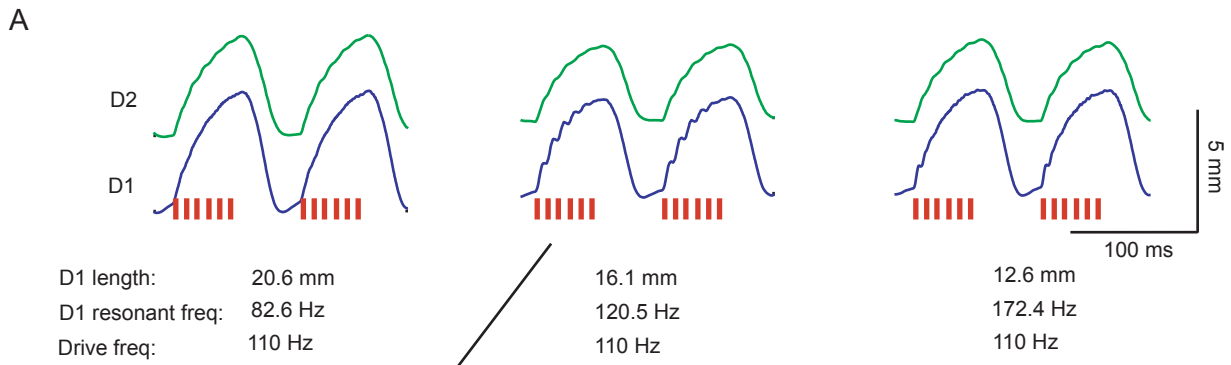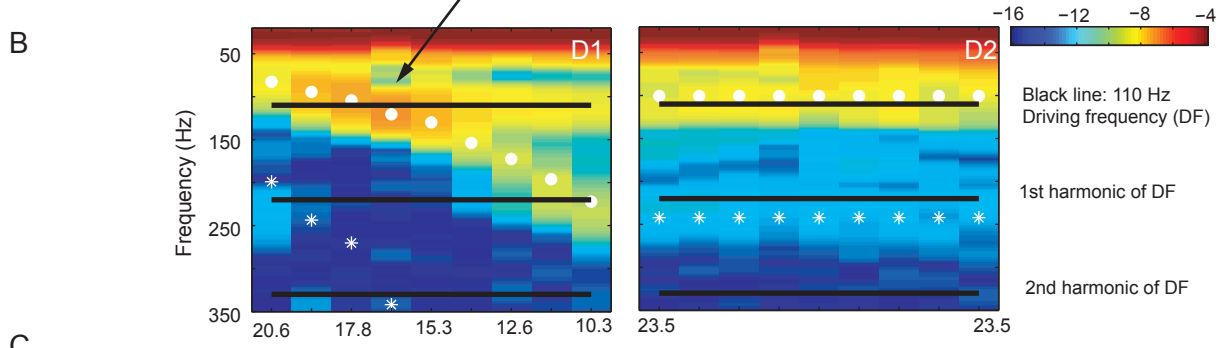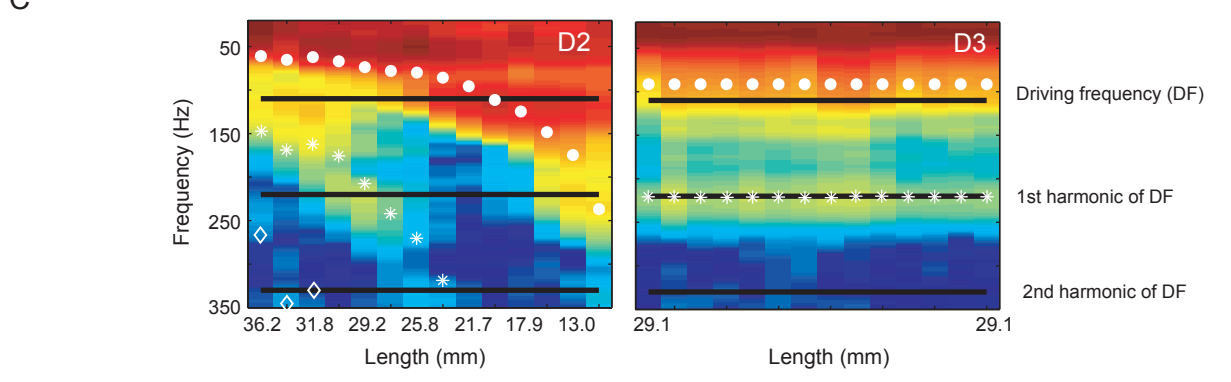

Supplement: pbio.0060215.sg001.pdf [file pbio.0060215.sg001.pdf]
